# Supplementary material for: Comprehensive Analyses of One-carbon Metabolism Related Genes and Their Association with Prognosis, Tumor microenvironment, Chemotherapy Resistance and Immunotherapy in Lung Adenocarcinoma
Source: Research Square preprint supplement (doi:10.21203/rs.3.rs-1969344/v1), 2022-08-22
Supplement: Supplementary file 1 [file c388b9b2ca22ded58013d9cb.docx]

| TABLE 1 | Clinicopathological Characteristics of Subgroups | | | | | |
| --- | --- | --- | --- | --- | --- |
|  | Low Risk Group |  | High Risk Group |  | P |
|
| Age |  | | |  | 0.384 |
| ≥70y | 85 160 |  | 75 |  |  |
| ＜70y | 160 |  | 167 |  |  |
| Gender |  | | |  | 0.262 |
| Male | 108 |  | 120 |  |  |
| Female | 141 |  | 128 |  |  |
| Race |  | | |  | 0.590 |
| White | 192 |  | 192 |  |  |
| Black | 27 |  | 24 |  |  |
| Other | 30 |  | 32 |  |  |
| Stage |  | | |  | 0.036 |
| I | 146 |  | 121 |  |  |
| II | 55 |  | 63 |  |  |
| III | 36 |  | 44 |  |  |
| IV | 7 |  | 18 |  |  |
| T stage |  | | |  | 0.070 |
| T1 | 95 |  | 71 |  |  |
| T2 | 119 |  | 148 |  |  |
| T3 | 23 |  | 20 |  |  |
| T4 | 10 |  | 8 |  |  |
| N stage |  | | |  | 0.079 |
| N0 | 169 |  | 152 |  |  |
| N1-N3 | 73 |  | 92 |  |  |
| M stage |  | | |  | 0.016 |
| M0 | 167 |  | 164 |  |  |
| M1 | 6 |  | 18 |  |  |
| Smoking Status |  | | |  | ＜0.001 |
| Non-smoker | 47 |  | 24 |  |  |
| Current Smoker | 44 |  | 74 |  |  |
| Reformed Smoker | 152 |  | 142 |  |  |
